# Supplementary figures and images for: Synthesis, characterisation and speciation studies of heterobimetallic pyridinehydroxamate-bridged Pt(ii)/M(ii) complexes (M = Cu, Ni, Zn). Crystal structure of a novel heterobimetallic 3-pyridinehydroxamate-bridged Pt(ii)/Cu(ii) wave-like coordination polymer
Source: Royal Society of Chemistry journal article supplement (doi:10.1039/b501105a), 2005-01-01

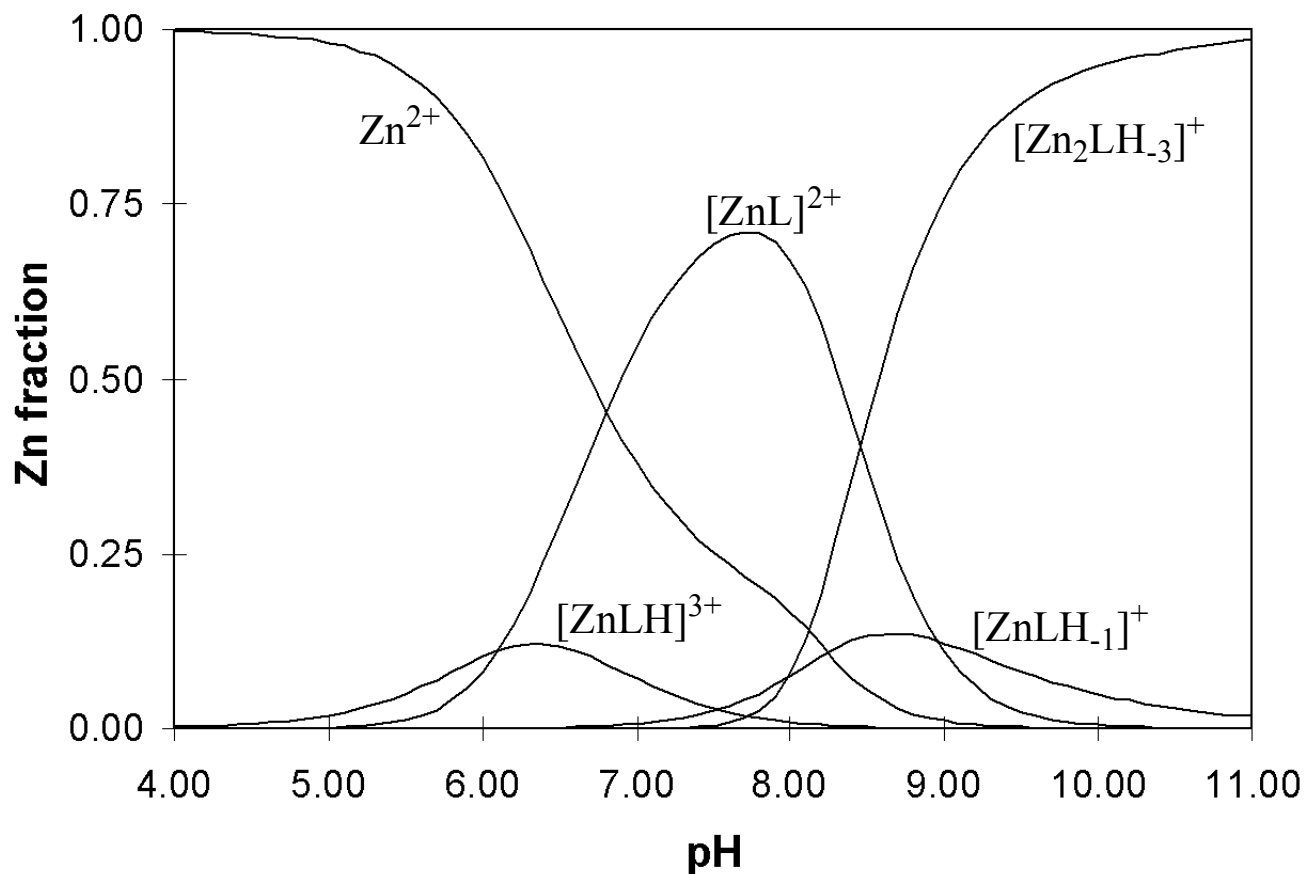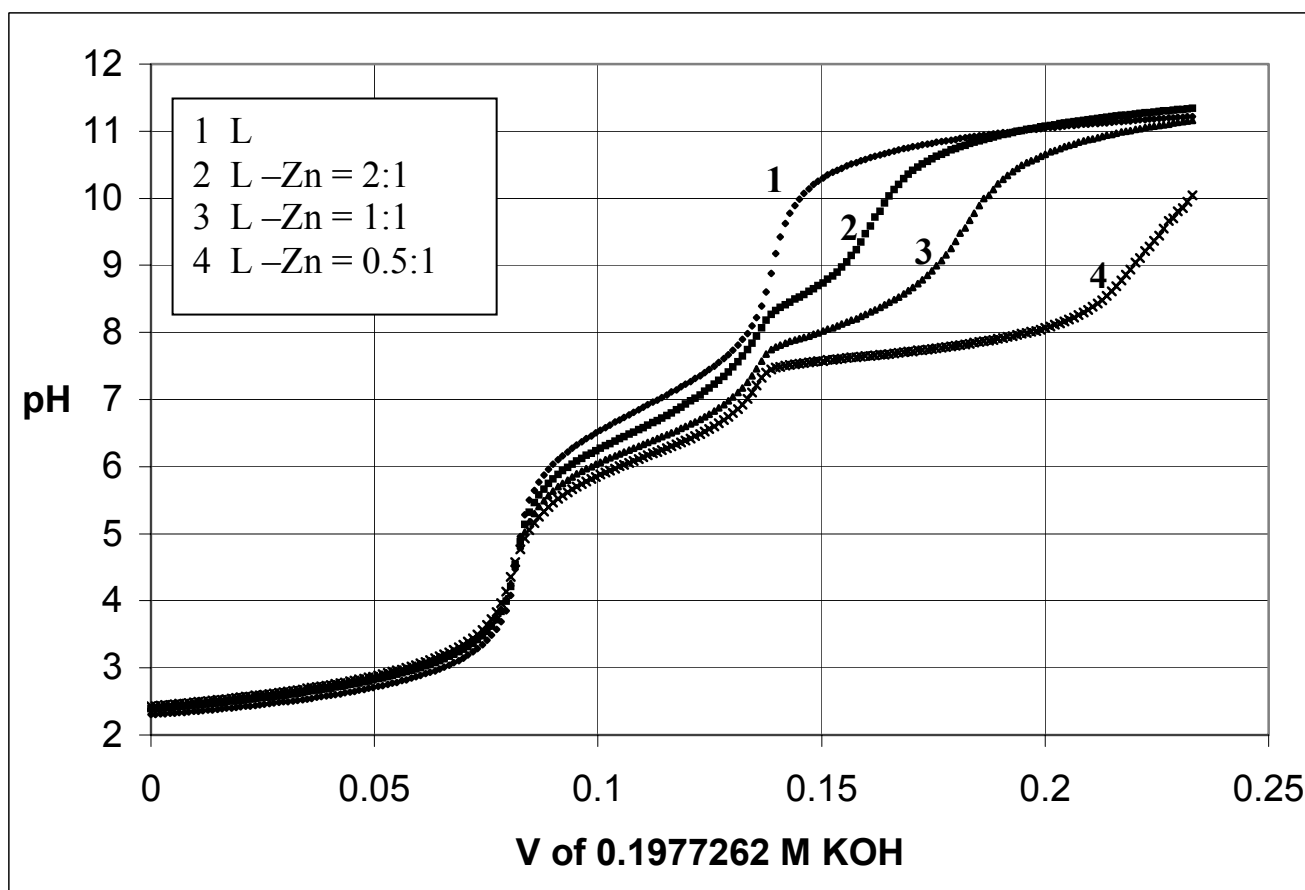

Supplement: b501105a.pdf [file b501105a.pdf]
